# Supplementary material
Source: Springer Nature journal article supplement (https://www.springermedizin.de/resource/supplementary/13045_2010_112_MOESM2_ESM.pdf/9660680)

HL-60, AN-V, Cont.001

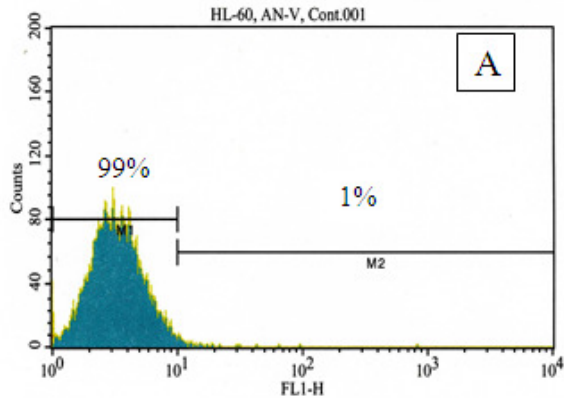

HL-60, AN-V, 2ppm, ATO.001

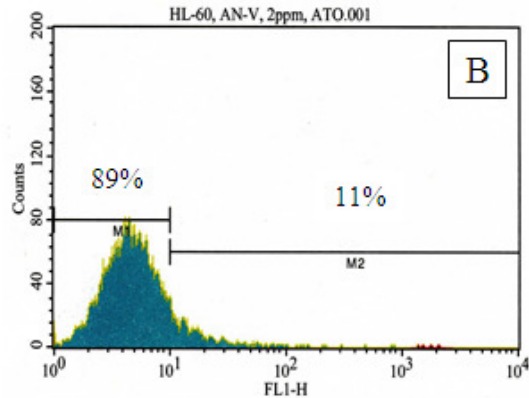

HL-60, AN-V, 4ppm, ATO.001

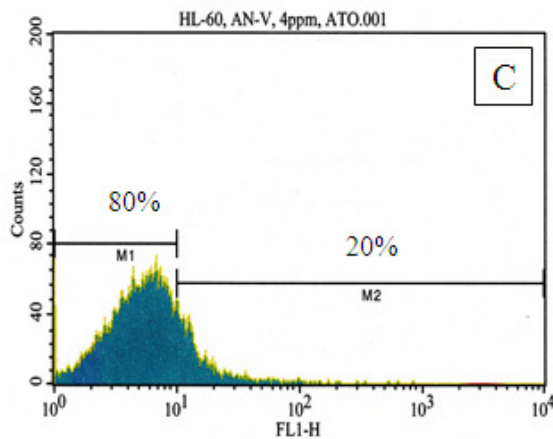

HL-60, AN-V, 6ppm, ATO.001

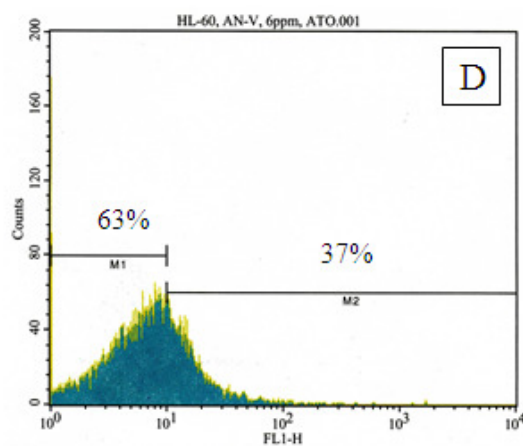

HL-60, AN-V, 8ppm, ATO.001

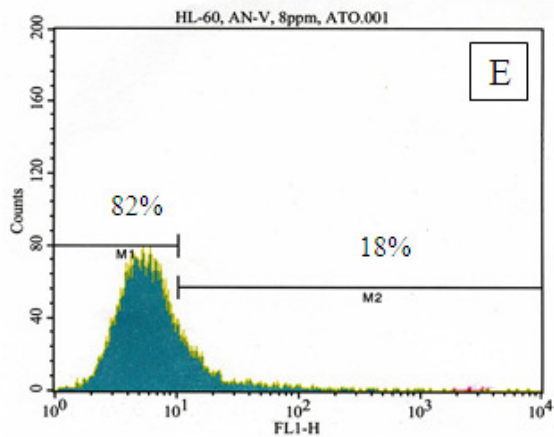

Supplement: MOESM2 [file 9660680]
